# Supplementary material for: Screening the Best Compatibility of Selaginella moellendorffii Prescription on Hyperuricemia and Gouty Arthritis and Its Mechanism
Source: Hindawi journal article supplement (doi:10.1155/2019/7263034), 2019-07-11

# Graphic Abstract

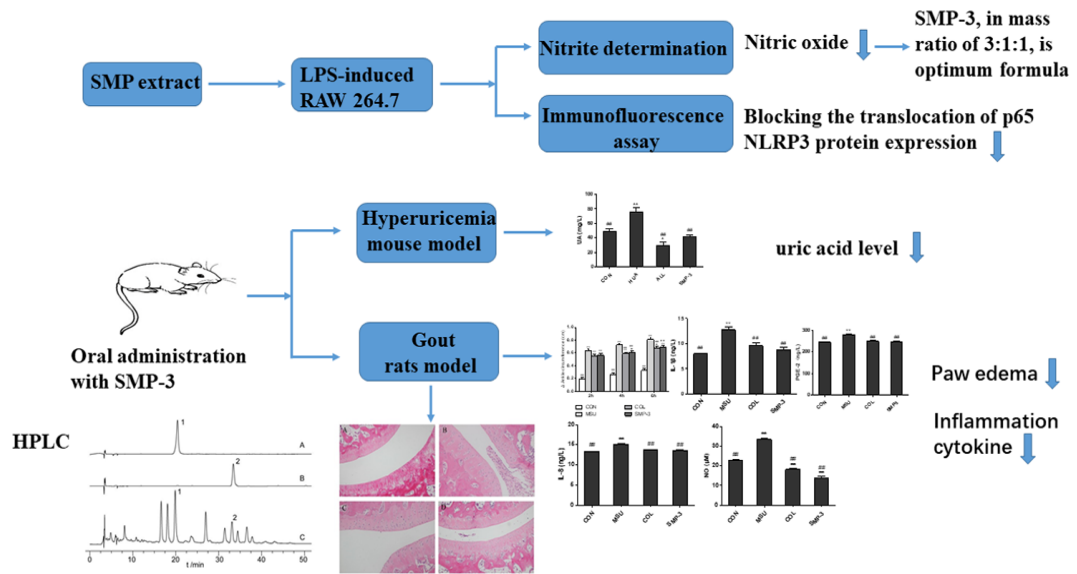

Supplement: f1 [file 7263034.f1.pdf]
